# Supplementary material
Source: PubMed Central journal article supplement (PMC8656349)
Supplement: NIHMS1754502-supplement-Supplemental_info_and_Tables_S3__S5.pdf [file NIHMS1754502-supplement-Supplemental_info_and_Tables_S3__S5.pdf]

In the format provided by the authors and unedited.

# A framework for the investigation of rare genetic disorders in neuropsychiatry

Stephan J. Sanders<sup>1</sup>, Mustafa Sahin<sup>2</sup>, Joseph Hostyk<sup>3</sup>, Audrey Thurm<sup>4</sup>,  
Sebastien Jacquemont<sup>5</sup>, Paul Avillach<sup>6</sup>, Elise Douard<sup>5</sup>, Christa L. Martin<sup>7</sup>, Meera E. Modi<sup>2</sup>,  
Andres Moreno-De-Luca<sup>7</sup>, Armin Raznahan<sup>4</sup>, Alan Anticevic<sup>8,9</sup>, Ricardo Dolmetsch<sup>10</sup>,  
Guoping Feng<sup>11,12</sup>, Daniel H. Geschwind<sup>13</sup>, David C. Glahn<sup>8</sup>, David B. Goldstein<sup>3</sup>,  
David H. Ledbetter<sup>7</sup>, Jennifer G. Mulle<sup>14</sup>, Sergiu P. Pasca<sup>15</sup>, Rodney Samaco<sup>16</sup>,  
Jonathan Sebat<sup>17</sup>, Anne Pariser<sup>18</sup>, Thomas Lehner<sup>4</sup>, Raquel E. Gur<sup>19\*</sup> and Carrie E. Bearden<sup>20\*</sup>

<sup>1</sup>Department of Psychiatry, UCSF Weill Institute for Neurosciences, University of California, San Francisco, San Francisco, CA, USA. <sup>2</sup>Department of Neurology, Boston Children's Hospital and Harvard Medical School, Boston, MA, USA. <sup>3</sup>Institute for Genomic Medicine, Columbia University Medical Center, Hammer Health Sciences, New York, NY, USA. <sup>4</sup>National Institute of Mental Health, Bethesda, MD, USA. <sup>5</sup>CHU Sainte-Justine Research Centre, University of Montreal, Montreal, Quebec, Canada. <sup>6</sup>Department of Biomedical Informatics, Harvard Medical School, Boston, MA, USA. <sup>7</sup>Geisinger Autism & Developmental Medicine Institute, Danville, PA, USA. <sup>8</sup>Tommy Fuss Center for Neuropsychiatric Disease Research, Boston Children's Hospital, Boston, MA, USA. <sup>9</sup>Department of Psychiatry, Harvard Medical School, Boston, MA, USA. <sup>10</sup>Department of Neuroscience, Novartis Institutes for BioMedical Research, Cambridge, MA, USA. <sup>11</sup>McGovern Institute for Brain Research and Department of Brain and Cognitive Sciences, Massachusetts Institute of Technology, Cambridge, MA, USA. <sup>12</sup>Stanley Center for Psychiatric Research, Broad Institute of MIT and Harvard, Cambridge, MA, USA. <sup>13</sup>Center for Autism Research and Treatment, Semel Institute for Neuroscience and Human Behavior and Departments of Neurology and Human Genetics, David Geffen School of Medicine, University of California Los Angeles, Los Angeles, CA, USA. <sup>14</sup>Department of Human Genetics, Emory University School of Medicine, Atlanta, GA, USA. <sup>15</sup>Department of Psychiatry and Behavioral Sciences, Stanford University, Palo Alto, CA, USA. <sup>16</sup>Department of Molecular and Human Genetics, Baylor College of Medicine, Houston, TX, USA. <sup>17</sup>Beyster Center for Genomics of Psychiatric Diseases, University of California, San Diego, La Jolla, CA, USA. <sup>18</sup>National Center for Advancing Translational Sciences, Bethesda, MD, USA. <sup>19</sup>Department of Psychiatry, Neuropsychiatry Section, and the Lifespan Brain Institute, Perelman School of Medicine and Children's Hospital of Philadelphia, University of Pennsylvania, Philadelphia, PA, USA. <sup>20</sup>Semel Institute for Neuroscience and Human Behavior, Departments of Psychiatry and Biobehavioral Sciences and Psychology, University of California, Los Angeles, Los Angeles, CA, USA. \*e-mail: [raquel@penmedicine.upenn.edu](mailto:raquel@penmedicine.upenn.edu); [cbearden@mednet.ucla.edu](mailto:cbearden@mednet.ucla.edu)

# Supplementary Information for

## **A framework for investigation of rare genetic disorders in neuropsychiatry**

Stephan J. Sanders<sup>1</sup>, Mustafa Sahin<sup>2</sup>, Joseph Hostyk<sup>3</sup>, Audrey Thurm<sup>4</sup>, Sebastien Jacquemont<sup>5</sup>, Paul Avillach<sup>6</sup>, Elise Douard<sup>5</sup>, Christa L. Martin<sup>7</sup>, Meera E. Modi<sup>2</sup>, Andres Moreno-De-Luca<sup>7</sup>, Armin Raznahan<sup>4</sup>, Alan Anticevic<sup>8</sup>, Ricardo Dolmetsch<sup>9</sup>, Guoping Feng<sup>10,11</sup>, Daniel H. Geschwind<sup>12</sup>, David C. Glahn<sup>8</sup>, David B. Goldstein<sup>3</sup>, David H. Ledbetter<sup>7</sup>, Jennifer G. Mulle<sup>13</sup>, Sergiu P. Pasca<sup>14</sup>, Rodney Samaco<sup>15</sup>, Jonathan Sebat<sup>16</sup>, Anne Pariser<sup>17</sup>, Thomas Lehner<sup>4</sup>, Raquel E. Gur<sup>18,\*</sup>, and Carrie E. Bearden<sup>19,\*</sup>

Correspondence to: raquel@pennmedicine.upenn.edu (R. E. G.), cbearden@mednet.ucla.edu (C.E.B.)

Affiliations shown in main manuscript.

This PDF file includes:

- Materials and Methods
- Tables S3 and S5
- References

## Materials and Methods

### Estimating the effect size of copy number variants (CNVs)

Large samples of cases and controls provide an opportunity to estimate the effect size on specific neuropsychiatric symptoms of some of the more common rare genetic disorders. We extending the approach described previously<sup>1</sup>, to estimate the frequency of these variants in defined cohorts systematically assessed for neurodevelopmental delay<sup>2,3</sup>, autism spectrum disorder<sup>4,5</sup>, and schizophrenia<sup>2,6,7</sup> and in general population controls from UK Biobank<sup>8</sup>. These estimates of frequency in cases and controls were compared to estimate odds ratios for each neuropsychiatric diagnosis at each CNV locus. These numbers are shown in Table S2 and plotted as a polar plot in Fig. 2 of the main text. For highly penetrant CNVs we lack sufficient population controls to accurately define the odds ratio, therefore we limited the plot to a maximum odds ratio of  $\geq 30$ .

### Estimating the effect size of single gene rare genetic disorders (RGDs)

On average, the population frequency of a specific single gene RGD is lower than the population frequency of the most well-defined CNV loci, due to the higher mutation rate of non-allelic homologous recombination (NAHR). Accordingly, larger populations of control samples will be needed to accurately define the effect size by an odds ratio. Furthermore, the completeness of reporting for specific neuropsychiatric domains varies (Fig. 2). As an estimate of the relative impact of each single gene RGD on different neuropsychiatric symptoms, we used the data systematically collected from the literature in the Developmental Brain Disorder Genes Database hosted at Geisinger (<https://dbd.geisingeradmi.org>) to quantify the relative frequency of different symptoms. The raw data are shown in Table S4 and plotted as a polar plot in Extended Data Fig. 1.

### Estimating the number of *de novo* PTVs for genome-wide significance for a given population size.

The rate at which germline *de novo* mutations arise in each gene is highly correlated with gene size (cDNA) and sequence context, especially GC content<sup>9,10</sup>. We used previously published estimates of per gene mutation rates for protein-truncating variants (PTVs) in 18,224 protein-coding genes based on exome sequencing of over 60,000 general population samples in ExAC<sup>10-12</sup>. To estimate the expected number of *de novo* PTVs in controls, we assessed the total number of *de novo* PTVs identified in 1,807 unaffected siblings from the Simons Simplex Collection, identifying 187 such mutations ( $187 / 1807 = 0.103$ ). The PTV mutations rates and estimate of *de novo* PTV rate in controls were combined to estimate the expected number of *de novo* PTVs per individual per gene. Multiplying these values by a given population size provided the expected number of *de novo* PTVs per gene in a cohort; this was used as the Lambda value ( $\lambda$ ) for a Poisson distribution. The probability of observing a specific number of *de novo* PTVs in the population was assessed using the cumulative density function (CDF) for a Poisson distribution with the estimated  $\lambda$  value. To reach genome-wide significance, this probability had to be lower than  $2.7 \times 10^{-6}$  based on a Bonferroni correction for all genes assessed ( $p=0.05/18,224$ ). We also considered searching only the 1,528 genes with high “probability loss-of-function intolerance” scores ( $pLI \geq 0.995$ ), giving a p-value threshold for high-pLI significance of  $3.3 \times 10^{-5}$  with Bonferroni correction ( $p=0.05/1,528$ ), however we would advocate for using the genome-wide significant threshold or a more conservative threshold.

Using this approach, we searched across a range of observed *de novo* PTVs (3, 5, 10, 20) and eight p-value thresholds ( $3.3 \times 10^{-5}$  to  $2.7 \times 10^{-12}$ ) to find the cohort size at which such an observation would result in a probability lower than the p-value threshold. To limit the compute required, we down-sampled to one in 15 genes. The results are shown in Extended Data Fig. 2.

In the main text (Fig. 3), we show a simplified version of this approach using a single p-value threshold ( $2.7 \times 10^{-6}$ ) and three cohort size (50,000, 100,000, and 200,000) to represent the effective cohort size of existing clinical exome sequencing (i.e. the total number of cases who could be reported in the literature). We note that these are estimates of the true number of individuals sequencing for a neuropsychiatric phenotype, and that the exact number is unknown, however current research cohorts include over 27,000 ASD cases between the Autism

Sequencing Consortium<sup>12</sup> and SPARK (<https://sparkforautism.org>), over 14,000 cases of severe developmental delay<sup>13</sup> (<https://decipher.sanger.ac.uk/ddd>), and over 5,000 cases of schizophrenia<sup>14</sup>. This sets a lower bar for the true number of cases sequenced at 46,000; adding smaller research cohorts and clinical exome sequencing leads to an estimate of 100,000 effective cases with neuropsychiatric symptoms and exome sequencing that could contribute to case reports. We also note that GeneDx describes an exome- and genome-sequencing database of over 155,000 samples (<https://www.genedx.com>), though many of these are likely to be controls or parents.

**Table S3.** Attendee list of the “Rare Genetic Disease Workshop: Window into Genomic Risk and Resilience of Mental Disorders” held at the NIMH Sept. 2017.

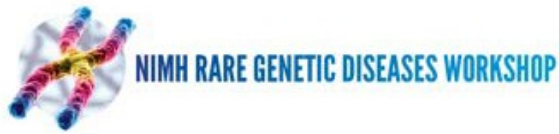

*ATTENDEE LIST*

| <b>Attendee Name</b>                | <b>Title</b>                                                                                                                                                                                      | <b>Affiliation</b>                                          |
|-------------------------------------|---------------------------------------------------------------------------------------------------------------------------------------------------------------------------------------------------|-------------------------------------------------------------|
| <b>Anjené Addington</b>             | Branch Chief, Genomics Research Branch                                                                                                                                                            | National Institute of Mental Health                         |
| <b>Alan Anticevic</b>               | Assistant Professor, Psychiatry and of Psychology;<br>Director, Anticevic Lab, Clinical Neuroscience<br>Research Unit                                                                             | Yale University                                             |
| <b>Alexander Arguello</b>           | Program Officer, Genomics Research Branch                                                                                                                                                         | National Institute of Mental Health                         |
| <b>Christopher Austin</b>           | Director, Office of the Director                                                                                                                                                                  | National Center for Advancing<br>Translational Sciences     |
| <b>Shelli Avenevoli</b>             | Deputy Director, Office of the Director                                                                                                                                                           | National Institute of Mental Health                         |
| <b>Paul Avillach</b>                | Assistant Professor, Pediatrics & Biomedical<br>Informatics                                                                                                                                       | Harvard University                                          |
| <b>Carrie Bearden</b>               | Professor, Department of Psychiatry &<br>Biobehavioral Sciences; Department of<br>Psychology                                                                                                      | University of California, Los Angeles                       |
| <b>Bettina Buhning</b>              | Chief, Learning and Memory Program,<br>Division of Neuroscience and Basic Behavioral<br>Science                                                                                                   | National Institute of Mental Health                         |
| <b>Andrea Beckel-<br/>Mitchener</b> | Acting Director, Office of Research Disparities and<br>Global Mental Health                                                                                                                       | National Institute of Mental Health                         |
| <b>Sarah Bergen</b>                 | Senior Researcher, Department of Medical<br>Epidemiology and Biostatistics                                                                                                                        | Karolinska Institutet                                       |
| <b>Raphael Bernier</b>              | Associate Professor, Department of Psychiatry &<br>Behavioral Sciences; Clinical Director, Seattle<br>Children's Autism Center; Associate Director,<br>Center on Human Development and Disability | University of Washington                                    |
| <b>Julia Berzhanskaya</b>           | Scientific Review Officer, Scientific Review Branch                                                                                                                                               | National Institute on Drug Abuse                            |
| <b>Diana Bianchi</b>                | Director, Office of the Director                                                                                                                                                                  | National Institute of Child Health and<br>Human Development |
| <b>Lora Bingaman</b>                | Program Analyst, Office of Genomics Research<br>Coordination                                                                                                                                      | National Institute of Mental Health                         |
| <b>Linda Brady</b>                  | Director, Division of Neuroscience and Basic<br>Behavioral Science                                                                                                                                | National Institute of Mental Health                         |
| <b>Kristin Cadenhead</b>            | Psychiatrist; Professor of Psychiatry                                                                                                                                                             | University of California, San Diego                         |
| <b>Wendy Chung</b>                  | Kennedy Family Professor of Pediatrics and<br>Medicine                                                                                                                                            | Columbia University                                         |

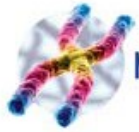

| <b>Attendee Name</b>           | <b>Title</b>                                                                                                                                                                                                                                                                                                                                                            | <b>Affiliation</b>                                       |
|--------------------------------|-------------------------------------------------------------------------------------------------------------------------------------------------------------------------------------------------------------------------------------------------------------------------------------------------------------------------------------------------------------------------|----------------------------------------------------------|
| <b>John Constantino</b>        | Professor of Psychiatry and Pediatrics; Director, William Greenleaf Eliot Division of Child & Adolescent Psychiatry; Co-Director, Intellectual and Developmental Disabilities Research Center                                                                                                                                                                           | Washington University in St. Louis                       |
| <b>Ricardo Dolmetsch</b>       | Global Head, Neuroscience                                                                                                                                                                                                                                                                                                                                               | Novartis Institutes for Biomedical Research              |
| <b>Tara Dutka</b>              | Program Officer, Office of Genomics Research Coordination                                                                                                                                                                                                                                                                                                               | National Institute of Mental Health                      |
| <b>Tuba Fehr</b>               | AAAS Science and Technology Policy Fellow                                                                                                                                                                                                                                                                                                                               | National Institute of Child Health and Human Development |
| <b>Guoping Feng</b>            | Investigator, Department of Brain and Cognitive Sciences; McGovern Institute for Brain Research                                                                                                                                                                                                                                                                         | Massachusetts Institute of Technology                    |
| <b>Daniel Geschwind</b>        | Director, Center for Autism Research and Treatment (CART); Gordon and Virginia MacDonald Distinguished Chair, Human Genetics; Professor, Neurology; Professor, Psychiatry and Biobehavioral Sciences; Co-Director, Center for Neurobehavioral Genetics; Professor In-Residence, Tennenbaum Center for the Biology of Creativity; Professor In-Residence, Human Genetics | University of California, Los Angeles                    |
| <b>David Glahn</b>             | Professor of Psychiatry and Psychology, Department of Psychiatry, Olin Neuropsychiatry Research Center; Co-Director, Neurocognition, Neurocomputation and Neurogenetics (n3) Division                                                                                                                                                                                   | Yale University                                          |
| <b>David Goldstein</b>         | Director of the Institute for Genomic Medicine, Professor of Genetics and Development                                                                                                                                                                                                                                                                                   | Columbia University                                      |
| <b>Rashmi Gopal-Srivastava</b> | Director, Extramural Research Program, Office of Rare Diseases Research                                                                                                                                                                                                                                                                                                 | National Center for Advancing Translational Sciences     |
| <b>Joshua Gordon</b>           | Director, Office of the Director                                                                                                                                                                                                                                                                                                                                        | National Institute of Mental Health                      |
| <b>Raquel Gur</b>              | Professor of Psychiatry Neurology and Radiology; Neuropsychiatry Section; Schizophrenia Research Center; Department of Psychiatry                                                                                                                                                                                                                                       | University of Pennsylvania                               |
| <b>Stephen Hooper</b>          | Adjunct Professor, Psychiatry and Behavioral Sciences                                                                                                                                                                                                                                                                                                                   | University of North Carolina – Chapel Hill               |



| <b>Attendee Name</b>        | <b>Title</b>                                                                                                                                     | <b>Affiliation</b>                                       |
|-----------------------------|--------------------------------------------------------------------------------------------------------------------------------------------------|----------------------------------------------------------|
| <b>Sébastien Jacquemont</b> | Associate Professor, Department of Pediatrics, Faculty of Medicine; Medical Geneticist, CHU Sainte Justine; Scientific Director, CARTaGENE, 2015 | University of Montréal                                   |
| <b>Alice Kau</b>            | Program Director, Research on Autism Spectrum Disorders, Intellectual and Developmental Disabilities Branch                                      | National Institute of Child Health and Human Development |
| <b>Tracy King</b>           | Medical Officer, Intellectual and Developmental Disabilities Branch                                                                              | National Institute of Child Health and Human Development |
| <b>Susan Koester</b>        | Deputy Director, Division of Neuroscience and Basic Behavioral Science                                                                           | National Institute of Mental Health                      |
| <b>Danuta Krotoski</b>      | Program Officer, Intellectual and Developmental Disabilities Branch                                                                              | National Institute of Child Health and Human Development |
| <b>David Ledbetter</b>      | Executive Vice President and Chief Scientific Officer                                                                                            | Geisinger Health System                                  |
| <b>Thomas Lehner</b>        | Director, Office of Genomics Research Coordination                                                                                               | National Institute of Mental Health                      |
| <b>Holly Lisanby</b>        | Director, Division of Translational Science                                                                                                      | National Institute of Mental Health                      |
| <b>Christa Martin</b>       | Director and Professor, Autism and Developmental Medicine Institute                                                                              | Geisinger Health System                                  |
| <b>Doug Meinecke</b>        | Program Officer, Division of Translational Science                                                                                               | National Institute of Mental Health                      |
| <b>Jennifer Mulle</b>       | Assistant Professor, Department of Epidemiology                                                                                                  | Emory University                                         |
| <b>Stanley Nelson</b>       | Professor In-Residence, Human Genetics; Director, DNA Microarray Technology; Co-Director, Center for Duchenne Muscular Dystrophy                 | University of California, Los Angeles                    |
| <b>David Panchision</b>     | Program Chief, Developmental Neurobiology Program, Division of Neuroscience and Basic Behavioral Science                                         | National Institute of Mental Health                      |
| <b>Enrique Michelotti</b>   | Program Director, Molecular Biology, Division of Neuroscience and Basic Behavioral Science                                                       | National Institute of Mental Health                      |
| <b>Anne Pariser</b>         | Deputy Director, Office of Rare Diseases Research                                                                                                | National Center for Advancing Translational Sciences     |
| <b>Sergiu Pasca</b>         | Assistant Professor, Psychiatry and Behavioral Sciences, Stanford Center for Sleep Sciences and Medicine                                         | Stanford University                                      |

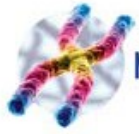

| Attendee Name           | Title                                                                                                                                                                                                                | Affiliation                                             |
|-------------------------|----------------------------------------------------------------------------------------------------------------------------------------------------------------------------------------------------------------------|---------------------------------------------------------|
| <b>Alan Percy</b>       | Professor and Director, Neurology, Rett Syndrome Clinic                                                                                                                                                              | University of Alabama at Birmingham                     |
| <b>Kevin Pelphey</b>    | Carbonell Family Professor; Director of Autism and Neurodevelopmental Disorders Institute                                                                                                                            | The George Washington University                        |
| <b>Erin Ramos</b>       | Program Director, Division of Genomic Medicine                                                                                                                                                                       | National Human Genome Research Institute                |
| <b>Armin Raznahan</b>   | Chief, Developmental Neurogenomics Unit, Human Genetics Branch, Intramural Research Program                                                                                                                          | National Institute of Mental Health                     |
| <b>Judith Rumsey</b>    | Chief, Brain Imaging Clinical Research Program                                                                                                                                                                       | National Institute of Mental Health                     |
| <b>Mustafa Sahin</b>    | Professor, Department of Neurology, Harvard Medical School; Director, Translational Neuroscience Center                                                                                                              | Boston Children's Hospital                              |
| <b>Rodney Samaco</b>    | Assistant Professor, Department of Molecular and Human Genetics; Associate Director, BCM Intellectual and Developmental Disabilities Research Center (IDDRC); Director, BCM IDDRC & TCH Rodent Neurobehavioral Cores | Baylor College of Medicine                              |
| <b>Stephan Sanders</b>  | Assistant Professor, Department of Psychiatry; Institute of Human Genetics; Director, Psychiatry Bioinformatics Core                                                                                                 | University of California, San Francisco                 |
| <b>Christian Schaaf</b> | Assistant Professor, Molecular and Human Genetics                                                                                                                                                                    | Baylor College of Medicine                              |
| <b>Jonathan Sebat</b>   | Chief, Beyster Center for Molecular Genomics of Neuropsychiatric Diseases; Professor of Psychiatry and Cellular and Molecular Medicine                                                                               | University of California, San Diego                     |
| <b>Geetha Senthil</b>   | Program Director, Office of Genomics Research Coordination                                                                                                                                                           | National Institute of Mental Health                     |
| <b>Vandana Shashi</b>   | Professor of Pediatrics, Department of Pediatrics                                                                                                                                                                    | Duke University                                         |
| <b>David Sommers</b>    | Scientific Review Officer, Extramural Review Branch                                                                                                                                                                  | National Institute of Mental Health                     |
| <b>Randall Stewart</b>  | Program Director, Channels, Synapses, and Circuits, Division of Neuroscience                                                                                                                                         | National Institute of Neurological Disorders and Stroke |





| <b>Attendee Name</b>  | <b>Title</b>                                                                 | <b>Affiliation</b>                                      |
|-----------------------|------------------------------------------------------------------------------|---------------------------------------------------------|
| <b>Edmund Talley</b>  | Program Director, Channels, Synapses, and Circuits, Division of Neuroscience | National Institute of Neurological Disorders and Stroke |
| <b>Audrey Thurm</b>   | Clinical Psychologist, Pediatrics and Developmental Neuroscience Branch      | National Institute of Mental Health                     |
| <b>Lu Wang</b>        | Program Director, NHGRI Genome Sequencing Program                            | National Human Genome Research Institute                |
| <b>Lois Winsky</b>    | Chief, Molecular, Cellular, and Genomic Neuroscience Research Branch         | National Institute of Mental Health                     |
| <b>Anastasia Wise</b> | Epidemiologist, Division of Genomic Medicine                                 | National Human Genome Research Institute                |
| <b>Susan Wright</b>   | Program Officer, Office of Genomics Research Coordination                    | National Institute of Mental Health                     |

**Table S5.** Stakeholders in rare genetic disorders.

| Stakeholder                                 | Possible Roles                                                                                                                                                                                                                                                                                                                                                                                                          | Examples                                                                                                                                                                                                                                                                                                                                                                                                                                                                                                                                                                                                                                                                                                                                                                                                                                                                                                                                                                                                                                                                                                     |
|---------------------------------------------|-------------------------------------------------------------------------------------------------------------------------------------------------------------------------------------------------------------------------------------------------------------------------------------------------------------------------------------------------------------------------------------------------------------------------|--------------------------------------------------------------------------------------------------------------------------------------------------------------------------------------------------------------------------------------------------------------------------------------------------------------------------------------------------------------------------------------------------------------------------------------------------------------------------------------------------------------------------------------------------------------------------------------------------------------------------------------------------------------------------------------------------------------------------------------------------------------------------------------------------------------------------------------------------------------------------------------------------------------------------------------------------------------------------------------------------------------------------------------------------------------------------------------------------------------|
| <b>Patients and caregivers</b>              | <ul style="list-style-type: none"> <li>• Work with advocacy groups to connect to multiple researchers</li> <li>• Advocate that health systems participate in research</li> </ul>                                                                                                                                                                                                                                        | <ul style="list-style-type: none"> <li>• Most advocacy groups for RGDs are created and run primarily by parents and caregivers, e.g. Phelan-McDermid Syndrome Foundation (<a href="https://www.pmsf.org">https://www.pmsf.org</a>)</li> </ul>                                                                                                                                                                                                                                                                                                                                                                                                                                                                                                                                                                                                                                                                                                                                                                                                                                                                |
| <b>Advocacy groups</b>                      | <ul style="list-style-type: none"> <li>• Work with funders to design maximally effective initiatives</li> <li>• Work with multiple research groups to facilitate communication</li> </ul>                                                                                                                                                                                                                               | <ul style="list-style-type: none"> <li>• For a listing of groups, see: <a href="https://rarediseases.org/for-patients-and-families/connect-others/find-patient-organization/">https://rarediseases.org/for-patients-and-families/connect-others/find-patient-organization/</a></li> </ul>                                                                                                                                                                                                                                                                                                                                                                                                                                                                                                                                                                                                                                                                                                                                                                                                                    |
| <b>Clinical Research groups</b>             | <ul style="list-style-type: none"> <li>• Advance theoretically driven-efforts to collect and share systematically obtained data from a variety of genetics-first approach studies to: <ul style="list-style-type: none"> <li>• Merge and integrate available databases</li> <li>• Define best data formats for prospective studies</li> <li>• Mobilize existing data for cross-disorder analyses</li> </ul> </li> </ul> | <ul style="list-style-type: none"> <li>• Mind and Genes <a href="http://www.minds-genes.org">http://www.minds-genes.org</a></li> <li>• Imagine <a href="https://imagine-id.org">https://imagine-id.org</a></li> <li>• International 22q11.2 Brain Behavior Consortium <a href="http://www.22q11-ibbc.org/">http://www.22q11-ibbc.org/</a></li> <li>• The Investigation of Genetic Exome Research (TIGER) Study <a href="https://depts.washington.edu/rablab/research-studies-2/research-studies/tiger/">https://depts.washington.edu/rablab/research-studies-2/research-studies/tiger/</a></li> <li>• ECHO Study CNV Research <a href="https://www.cardiff.ac.uk/mrc-centre-neuropsychiatric-genetics-genomics/research/themes/developmental-disorders/echo-study-cnv-research">https://www.cardiff.ac.uk/mrc-centre-neuropsychiatric-genetics-genomics/research/themes/developmental-disorders/echo-study-cnv-research</a></li> <li>• FIND (Further Information on Neurogenic Disorders) <a href="http://www.findresources.co.uk/professionals">http://www.findresources.co.uk/professionals</a></li> </ul> |
| <b>Healthcare systems</b>                   | <ul style="list-style-type: none"> <li>• Organize efforts around rare disorders to collect systematic data on phenotypes</li> <li>• Implement consistent genotyping in patients</li> <li>• Implement broad neuropsychiatric measures to facilitate retrospective data harmonization</li> </ul>                                                                                                                          | <ul style="list-style-type: none"> <li>• Deciphering Developmental disorders (DDD) <a href="https://decipher.sanger.ac.uk/ddd#overview">https://decipher.sanger.ac.uk/ddd#overview</a></li> <li>• Institute for Molecular Medicine Finland (FIMM) <a href="https://www.fimm.fi">https://www.fimm.fi</a></li> <li>• Vanderbilt Genetics Institute <a href="https://www.vumc.org/vgi/">https://www.vumc.org/vgi/</a></li> <li>• Geisinger Genomic Medicine Institute <a href="https://www.geisinger.edu/research/departments-and-centers/gmi">https://www.geisinger.edu/research/departments-and-centers/gmi</a></li> </ul>                                                                                                                                                                                                                                                                                                                                                                                                                                                                                    |
| <b>Collaborations across health systems</b> | <ul style="list-style-type: none"> <li>• Partner with other health care systems to expand the reach of their initiatives</li> <li>• Work with other researchers to consolidate data and harmonize existing data</li> <li>• Implement broad neuropsychiatric measures to facilitate retrospective harmonization</li> </ul>                                                                                               | <ul style="list-style-type: none"> <li>• EU-Aims <a href="https://www.eu-aims.eu">https://www.eu-aims.eu</a></li> <li>• SPARK <a href="https://sparkforautism.org">https://sparkforautism.org</a></li> <li>• Genome to Brain (G2B) <a href="https://geisingeradmi.org/care-innovation/studies/the-genome-to-brain-network-g2b/">https://geisingeradmi.org/care-innovation/studies/the-genome-to-brain-network-g2b/</a></li> </ul>                                                                                                                                                                                                                                                                                                                                                                                                                                                                                                                                                                                                                                                                            |
| <b>Funding agencies</b>                     | <ul style="list-style-type: none"> <li>• Emphasize and support the need for implementation of core phenotypic measures that span diagnostic categories</li> <li>• Emphasize need for use of broad neuropsychiatric measures to facilitate retrospective harmonization</li> <li>• Emphasize early collaboration and coordination across groups working in this space</li> </ul>                                          | <ul style="list-style-type: none"> <li>• NCATS funded Rare Disease Clinical Research Networks (RDCRN) trans-diagnostic, 'genetic first' projects, Consortia and organizations, e.g.: <ul style="list-style-type: none"> <li>• Full list: <a href="https://ncats.nih.gov/rdcrn/consortia">https://ncats.nih.gov/rdcrn/consortia</a></li> <li>• Rett Syndrome Natural History (<i>MECP2</i> and related genes) <a href="https://ncats.nih.gov/rdcrn/consortia#rett">https://ncats.nih.gov/rdcrn/consortia#rett</a></li> <li>• Developmental Synaptopathies (<i>TSC</i>, <i>PTEN</i>, <i>SHANK3</i>) <a href="https://ncats.nih.gov/rdcrn/consortia#developmental">https://ncats.nih.gov/rdcrn/consortia#developmental</a></li> </ul> </li> <li>• Simons VIP Connect <a href="https://simonsvipconnect.org/">https://simonsvipconnect.org/</a></li> </ul>                                                                                                                                                                                                                                                       |

|                                                                                             |                                                                                                                                                                                                                                                                                                                                                                                                                                                                                                                                                     |                                                                                                                                                                                                                                                                                                                                                                                                                                                                                                                                                                                                                                                                                                                                                                                                                                                                                                                                                                                                                                                  |
|---------------------------------------------------------------------------------------------|-----------------------------------------------------------------------------------------------------------------------------------------------------------------------------------------------------------------------------------------------------------------------------------------------------------------------------------------------------------------------------------------------------------------------------------------------------------------------------------------------------------------------------------------------------|--------------------------------------------------------------------------------------------------------------------------------------------------------------------------------------------------------------------------------------------------------------------------------------------------------------------------------------------------------------------------------------------------------------------------------------------------------------------------------------------------------------------------------------------------------------------------------------------------------------------------------------------------------------------------------------------------------------------------------------------------------------------------------------------------------------------------------------------------------------------------------------------------------------------------------------------------------------------------------------------------------------------------------------------------|
| <b>Pharmaceutical Companies</b>                                                             | <ul style="list-style-type: none"> <li>Facilitate the pre-clinical focused consortia or consortia with pre-clinical elements in partnership with other groups</li> </ul>                                                                                                                                                                                                                                                                                                                                                                            | <ul style="list-style-type: none"> <li>Novartis (e.g. TSC) <a href="https://www.novartis.co.uk/rare-diseases">https://www.novartis.co.uk/rare-diseases</a></li> </ul>                                                                                                                                                                                                                                                                                                                                                                                                                                                                                                                                                                                                                                                                                                                                                                                                                                                                            |
| <b>Trans-diagnostic, 'genetic first' projects, networks consortia, and organizations</b>    | <ul style="list-style-type: none"> <li>Foster complementary approaches for building resources and establishing cohorts (e.g. mining Electronic Medical Records, focused clinical recruitment, patient advocacy groups)</li> <li>Increase infrastructure for coordination and collaboration</li> <li>Expand use of consistent broad and deep phenotyping across projects to facilitate harmonization efforts</li> <li>Coordinate investments to be synergistic – invest in operations with quality control to leverage existing resources</li> </ul> | <ul style="list-style-type: none"> <li>National Organization for Rare Disorders <a href="https://rarediseases.org/">https://rarediseases.org/</a></li> <li>Global Genes RARE Foundation Alliance <a href="https://globalgenes.org/foundation-alliance-2list/">https://globalgenes.org/foundation-alliance-2list/</a></li> <li>AGENDA – Alliance for Genetic Etiologies in Neurodevelopmental Disorders and Autism <a href="https://www.gdaac.org/">https://www.gdaac.org/</a></li> <li>The Society for the Study of Behavioral Phenotypes <a href="http://www.ssbp.org.uk/index.html">http://www.ssbp.org.uk/index.html</a></li> <li>Rare Disease Foundation <a href="https://www.rarediseasefoundation.org/">https://www.rarediseasefoundation.org/</a></li> <li>UK Biobank <a href="http://www.ukbiobank.ac.uk">http://www.ukbiobank.ac.uk</a></li> <li>Matchmaker Exchange <a href="https://www.matchmakerexchange.org/">https://www.matchmakerexchange.org/</a></li> <li>International Rare Diseases Research Consortium (IRDiRC)</li> </ul> |
| <b>Trans-diagnostic Phenotypic Ontology projects, networks, consortia and organizations</b> | <ul style="list-style-type: none"> <li>Create and standardize ontologies for use in phenotypic studies</li> <li>Integrate, standardize and analyze heterogenous data from healthcare and research, via open-source, open-data community</li> </ul>                                                                                                                                                                                                                                                                                                  | <ul style="list-style-type: none"> <li>Phenotips (<a href="https://phenotips.org/">https://phenotips.org/</a>)</li> <li>PhenX toolkit (<a href="https://www.phenxtoolkit.org/about">https://www.phenxtoolkit.org/about</a>)</li> <li>i2b2 tranSMART Foundation (<a href="https://transmartfoundation.org">https://transmartfoundation.org</a>)</li> </ul>                                                                                                                                                                                                                                                                                                                                                                                                                                                                                                                                                                                                                                                                                        |

## References

1. Moreno-De-Luca, D., Moreno-De-Luca, A., Cubells, J. F. & Sanders, S. J. Cross-Disorder Comparison of Four Neuropsychiatric CNV Loci. *Curr. Genet. Med. Rep.* **2**, 1–11 (2014).
2. Kirov, G. *et al.* The penetrance of copy number variations for schizophrenia and developmental delay. *Biol. Psychiatry* **75**, (2014).
3. Moreno-De-Luca, D. *et al.* Using large clinical data sets to infer pathogenicity for rare copy number variants in autism cohorts. *Mol. Psychiatry* **18**, 1090–1095 (2013).
4. Sanders, S. J. *et al.* Insights into Autism Spectrum Disorder Genomic Architecture and Biology from 71 Risk Loci. *Neuron* **87**, 1215–1233 (2015).
5. Malhotra, D. & Sebat, J. CNVs: harbingers of a rare variant revolution in psychiatric genetics. *Cell* **148**, 1223–1241 (2012).
6. Marshall, C. R. *et al.* Contribution of copy number variants to schizophrenia from a genome-wide study of 41,321 subjects. *Nat. Genet.* **49**, 27–35 (2017).
7. Rees, E. *et al.* Analysis of copy number variations at 15 schizophrenia-associated loci. *Br. J. Psychiatry* **204**, 108–114 (2014).
8. Kendall, K. M. *et al.* Archival Report Cognitive Performance Among Carriers of Pathogenic Copy Number Variants: Analysis of 152,000 UK Biobank Subjects. *Biol. Psychiatry* 1–8 (2016). doi:10.1016/j.biopsych.2016.08.014
9. Sanders, S. J. *et al.* De novo mutations revealed by whole-exome sequencing are strongly associated with autism. *Nature* **485**, 237–41 (2012).
10. Samocha, K. E. *et al.* A framework for the interpretation of de novo mutation in human disease. *Nat. Genet.* **46**, 944–950 (2014).
11. Lek, M. *et al.* Analysis of protein-coding genetic variation in 60,706 humans. *Nature* **536**, 285–291 (2016).
12. Satterstrom, F. K. *et al.* Novel genes for autism implicate both excitatory and inhibitory cell lineages in risk. *bioRxiv* 484113 (2018). doi:10.1101/484113
13. McRae, J. F. *et al.* Prevalence and architecture of de novo mutations in developmental disorders. *Nature* **542**, 433–438 (2017).
14. Singh, T. *et al.* The contribution of rare variants to risk of schizophrenia in individuals with and without intellectual disability. *Nat Genet* **49**, 1167–1173 (2017).
15. Huguet, G. *et al.* Measuring and Estimating the Effect Sizes of Copy Number Variants on General Intelligence in Community-Based Samples. *JAMA psychiatry* (2018). doi:10.1001/jamapsychiatry.2018.0039
16. Lynch, M. Rate, molecular spectrum, and consequences of human mutation. *Proc Natl Acad Sci U S A* **107**, 961–968 (2010).
